# Supplementary material
Source: publisher site journal article supplement (https://www.spandidos-publications.com/3518/downloadSupplementary)
Supplement: Supplementary file 1 [file downloadSupplementary]

## Appendix S1

*Flow cytometric analysis.* Mononuclear cells were isolated from the waste blood of healthy donors by density gradient centrifugation with Lymphoprep™ (Axis-Shield PoC AS), according to the manufacturer's protocol, and CD56<sup>+</sup> cells were enriched using an immunomagnetic separation kit (Miltenyi Biotec GmbH), according to the manufacturer's protocol. The cells obtained ( $5 \times 10^5$ ) were treated with blocking solution [0.1% NaN<sub>3</sub>, 2.0% FBS (Biowest), 2% rabbit serum (animal house from Children's Hospital of Mexico Federico Gómez) and 5 mM EDTA] at 4°C for 1 h. Cells were subsequently stained with monoclonal antibodies (mAbs) at 4°C for

30 min; anti-CD56-PE mAbs (cat. no. 12-0567-42; Invitrogen; Thermo Fisher Scientific, Inc.) and anti-CD16-PerCP Cy5.5 (cat. no. 360712; BioLegend, Inc.) were used to identify the different subpopulations of NK cells. Cells were washed with staining buffer (0.1% NaN<sub>3</sub>, 2.0% FBS and 5 mM EDTA) and then fixed with 1% formalin at 4°C by 18 h. In total, 20,000 events from the lymphocyte regions were acquired using a FACS Aria II cytometer (BD Biosciences) following analysis with their respective autofluorescence and isotype controls, and analyzed using FlowJo version XV (Tree Star, Inc.).
